# Supplementary material for: A Rare Case of Solitary Neurofibroma Misdiagnosed as Diabetic Foot Ulcer in the Toe Tip Region
Source: Preprints.org preprint supplement (doi:10.20944/preprints202407.0310.v1), 2024-07-03

절제 생검 동의서

|           |               |     |                              |
|-----------|---------------|-----|------------------------------|
| 진단명       |               |     |                              |
| 수술/처치/검사  |               |     |                              |
| 참여<br>의료진 | 집도의1          | 이상철 | ■ 전문의(전문과목: 종양혈액내과 ), □ 일반의  |
|           | 집도의2          |     | □ 전문의(전문과목: ), □ 일반의(진료과목: ) |
| 시행 예정일    | 2024년 06월 10일 |     |                              |

1. 환자의 현재 상태

- ☐ 고혈압      ☐ 저혈압      ☐ 당뇨병      ☐ 알레르기      ☐ 흡연      ☐ 특이소견없음
- ☐ 특이체질      ☐ 출혈소인
- ☐ 투약사고      ☐ 기도이상
- ☐ 수술력      ☐ 약물복용력
- ☐ 기타질환 (심장, 호흡기, 신장질환 등)

2. 설명사항

(1) 수술(시술, 검사)의 목적 및 효과

- 1) 귀하의 현재 상태 : 촉진되거나 진단영상학적으로 확인된 종괴가 있습니다.
- 2) 절제 생검 수술은 환자분에게 발견된 종괴를 제거하여 미용적 측면에서의 향상을 목적으로 할 뿐만 아니라 조직학적 검사를 통한 종괴의 확진을 통해 적절한 진단 및 치료를 하기 위해 필요합니다.

(2) 수술(시술, 검사) 과정 및 방법

- 1) 수술부위에 국소마취를 합니다.
- 2) 반흔을 최소화 하되 종괴 제거를 효과적으로 할 수 있을 정도의 절개선을 표시합니다.
- 3) 피부 절개를 가하고 종괴를 제거합니다.
- 4) 수술부위 지혈 및 감염 예방을 위한 세척을 시행합니다.
- 5) 피부를 봉합하되 필요 시 피부 이식을 시행할 수 있습니다.
- 6) 소요 시간은 약 30 분 ~ 1 시간 30 분 가량 입니다.

(3) 발현 가능한 합병증(후유증)의 내용, 정도 및 대처방법

- 1) 본 수술을 시행 후 수술부 감염이 발생할 수 있으며, 이를 예방하기 위해 항생제를 투여할 수 있습니다.
- 2) 수술부위에 혈종이 생길 수 있으며 지속적인 혈종 형성시 수술부위 불유합, 감염의 원인이 될 수 있습니다.
- 3) 수술부위의 일시적인 감각 저하나 봉합부 반흔이 형성될 수 있습니다.

(4) 수술(시술, 검사) 관련 주의사항 (수술 후 건강관리에 필요한 사항)

- 1) 수술 부위의 회복 기간 중에는 상처 지연을 예방하기 위해 봉합사 제거 시까지 세수나 샤워를 삼갑니다.

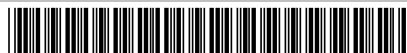

| 진료과 : | 주민등록번호 : | 병실 :

- 2) 수술 부위의 과도한 신전 및 굴곡을 피합니다.
- 3) 수술 부위 주변을 청결하게 유지합니다.

(5) 수술(시술, 검사) 방법의 변경 또는 수술범위의 추가 가능성

종양이 악성으로 밝혀진 경우 전이 여부 확인을 위한 영상학적 검사를 시행하거나, 종양 적출술 제거부위에 더 큰 범위로 재수술을 할 수 있습니다.

수술(시술, 검사) 과정에서 환자의 상태에 따라 부득이하게 수술(시술, 검사)방법이 변경되거나 수술(시술, 검사)범위가 추가될 수 있습니다.

(수술(시술, 검사) 방법 및 범위 변경 ☐

변경된 방법 및 범위:

사유:

(이 경우, 환자 또는 대리인에게 추가로 설명하여야 하는 사항이 있는 경우에는 수술(시술·검사)의 시행 전에 이에 대하여 설명하고 동의를 얻도록 합니다

다만, 수술의 시행 도중에 환자의 상태에 따라 미리 설명하고 동의를 얻을 수 없을 정도로 긴급한 수술방법의 변경 또는 수술 범위의 추가가 요구되는 경우에는 이에 따른 수술의 시행 후에 지체 없이 그 변경 또는 추가의 사유 및 수술의 시행결과를 환자 또는 대리인에게 설명하도록 합니다.)

(6) 주치의(집도의)의 변경 가능성

수술(시술, 검사) 과정에서 환자의 상태에 또는 의료기관의 사정(응급환자의 진료, 주치의(집도의)의 질병, 출산 등 일신상 사유, 기타 변경사유)에 따라 부득이하게 주치의(집도의)가 변경될 수 있습니다.

(주치의(집도의) 변경 ☐

사유:

(이 경우 수술(시술·검사)의 시행 전에 환자 또는 대리인에게 구체적인 변경사유를 설명하고 서면동의를 얻도록 합니다.

다만, 수술의 시행 도중에 환자의 상태에 따라 미리 설명하고 동의를 얻을 수 없을 정도로 긴급한 집도의의 변경이 요구되는 경우에는 이에 따른 수술의 시행 후에 지체 없이 구체적인 집도의의 변경 사유 및 수술의 시행결과를 환자 또는 대리인에게 설명하도록 합니다.)

(7) 기타사항

1) 예정된 의료행위가 시행되지 않았을 때의 결과

정확한 진단과 함께 그에 적절한 치료를 할 수 있는 시기를 놓칠 수도 있습니다.

2) 시행 가능한 다른 치료방법 : ☒ 없음 ☐ 있음

나(또는 환자)에 대한 수술(시술, 검사, 마취, 의식하진정)의 목적·효과·과정·예상되는 합병증·후유증 등에 대한 설명(필요시 별지 포함)을 의사로부터 들었음을 확인합니다. -----확인함 ☐

이 수술(시술, 검사, 마취, 의식하진정)로서 불가항력적으로 야기될 수 있는 합병증 또는 환자의 특이체질로 예상치 못한 사고가 생길 수 있다는 점을 위의 설명으로 이해했음을 확인합니다. -----확인함 ☐

이 수술(시술, 검사, 마취, 의식하진정)에 협력하고, 이 동의서 제1조의 환자의 현재 상태에 대해 성실하게 고지할 것을 서약하며, 이에 따른 의학적 처리를 주치의의 판단에 위임하여 이 수술(시술, 검사, 마취, 의식하진정)을 하는 데에 동의합니다. -----확인함 ☐

수술(시술·검사) 방법의 변경 또는 수술범위의 추가 가능성에 대한 설명을 이 수술(시술·검사·마취·의식하진정)의 시행 전에 의사로부터 들었음을 확인합니다. -----확인함 ☐

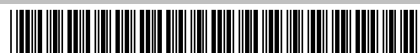

| 진료과 : | 주민등록번호 : | 병실 :

주치의(집도의)의 변경 가능성과 사유에 대한 설명을 이 수술(시술, 검사, 마취, 의식하진정)의 시행 전에 의사로부터 들었음을 확인합니다. -----확인함 ☐

본 치료방법의 수가 중 의료보험 요양급여 기준에 인정되지 않는 비급여 부분과 선택진료비는 본인이 전액 부담할 것을 동의합니다. -----확인함 ☐

20        년        월        일        시        분

< 설명의사 >

\* 이름 \_\_\_\_\_ 서명 \_\_\_\_\_

< 환자 >

\* 이름 \_\_\_\_\_ 서명 \_\_\_\_\_

\* 주민등록상의 생년월일:

\* 집전화:

\* 주소:

\* 휴대전화:

< 보호자 또는 대리인 >

\* 이름 \_\_\_\_\_ 서명 \_\_\_\_\_

\* 주민등록상의 생년월일:

\* 집전화:

\* 주소:

\* 휴대전화:

\* 환자와의 관계 \_\_\_\_\_

< 대리인이 서명하게 된 사유 > [근거 : 공정거래위원회 수술동의서 표준 약관]

☐ 환자의 신체, 정신적 장애로 인하여 약정 내용에 대하여 이해하지 못함

☐ 미성년자(만 19세 미만)로서 약정 내용에 대하여 이해하지 못함

☐ 설명하는 것이 환자의 심신에 중대한 나쁜 영향을 미칠것이 명백함

☐ 환자 본인이 승낙에 관한 권한을 특정인에게 위임함

(이 경우, 별도의 위임계약서를 본 동의서에 첨부하여야 함)

☐ 기타 \_\_\_\_\_

\* 의사의 상세한 설명은 이면지 또는 별지를 사용할 수 있습니다.(이 동의서에 첨부함)

\* 환자(또는 대리인)는 이 동의서 또는 별지 사본에 대한 교부를 요청할 수 있으며, 이 요청이 있을 경우 지체 없이 교부하도록 합니다. 단, 동의서 또는 별지 사본 교부 시 소요되는 비용을 청구할 수 있습니다.

\* 수술(검사, 시술) 후 보다 정확한 진단을 위하여 추가로 특수 검사를 시행할 수 있으며, 이 경우 추가비용을 청구할 수 있습니다.

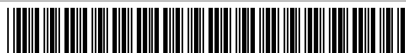

Supplement: Supplementary file 3 [file supplementary]
