# Supplementary material for: A Rare Case of Solitary Neurofibroma Misdiagnosed as Diabetic Foot Ulcer in the Toe Tip Region
Source: Preprints.org preprint supplement (doi:10.20944/preprints202407.0310.v1), 2024-07-03

## 환자사진 동영상 촬영 동의서

본인은 본인이 받은 시술과 관련하여 사진과 동영상 등이 촬영된 사실을 알고 있습니다. 또한 본인과 관련된 사진과 동영상은 본인 및 다른 환자의 진단과 치료를 위한 자료로 소중히 사용될 것이며, 의학 발전에 유용하게 사용되기 위해 오직 학술 목적으로만 논문에 인용될 수 있음을 설명 받았습니다.

본인의 사진과 동영상들이 학회지 논문에 인용될 때는 본인의 성별과 나이, 수술 시기, 치료와 관련된 학술적 정보가 기술되고, 신체 부위 사진이 제시되지만 본인의 개인 식별이 가능한 어떠한 정보도 노출되지 않음을 설명 들었습니다.

(단, 눈이 노출된 경우에 일부 신체 부위가 노출될 수 있으며, 안면 노출시 개인 식별이 어렵도록 처리됩니다.)

본인의 이러한 동의 여부와 앞으로 치료 과정에는 아무런 상관이 없으며, 의료진이 최선을 다해 본인을 치료하게 될 것이고 이러한 동의를 원하지 않더라도 의료진은 본인의 결정을 존중할 것임을 설명 들었습니다.

본인의 본 내용이 공공교육에 헌신할 수 있음을 알고 자발적으로 작성하였으며, 저작권과 사진 출판 및 용어에 대하여 충분히 이해하였습니다.

본인이 서명한 후에는 양도된 저작권은 무효화될 수 없으며, 서명 후 양도된 저작권은 서명한 순간부터 10년 후 소멸될 것임을 설명 들었습니다.

본인 ( )는 위와 같이 본인의 의학 사진 및 동영상의 저작권을 담당의사 ( )  
에게 위임합니다.

20      년      월      일      시      분

이 름 : \_\_\_\_\_ 서 명 : \_\_\_\_\_

담당의 : \_\_\_\_\_ 서 명 : \_\_\_\_\_

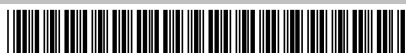

Supplement: Supplementary file 1 [file supplementary]
