# Supplementary material for: A Rare Case of Solitary Neurofibroma Misdiagnosed as Diabetic Foot Ulcer in the Toe Tip Region
Source: Preprints.org preprint supplement (doi:10.20944/preprints202407.0310.v1), 2024-07-03
Supplement: Supplementary file 2 [file supplementary]

임상시험심의결과통지서

|                       |                                                                                                                                                                                                                                                                                                                                                                                                                                                                                                                                                                           |            |                                                                                      |  |  |
|-----------------------|---------------------------------------------------------------------------------------------------------------------------------------------------------------------------------------------------------------------------------------------------------------------------------------------------------------------------------------------------------------------------------------------------------------------------------------------------------------------------------------------------------------------------------------------------------------------------|------------|--------------------------------------------------------------------------------------|--|--|
| 수신                    | 소 속                                                                                                                                                                                                                                                                                                                                                                                                                                                                                                                                                                       | 성형외과       |                                                                                      |  |  |
|                       | 책임연구자                                                                                                                                                                                                                                                                                                                                                                                                                                                                                                                                                                     | 김세영        |                                                                                      |  |  |
| IRB No.               | 2024-05-03                                                                                                                                                                                                                                                                                                                                                                                                                                                                                                                                                                |            |                                                                                      |  |  |
| 과제명                   | (국문) 당뇨병성 족부궤양으로 오인된 족부 첨단부 단독성 신경섬유종의 드문 증례<br>(영문) A Rare Case of Solitary Neurofibroma Misdiagnosed as Diabetic Foot Ulcer in Toe Tip Region                                                                                                                                                                                                                                                                                                                                                                                                                           |            |                                                                                      |  |  |
| 연구대상                  | <input type="checkbox"/> 의약품 <input type="checkbox"/> 의료기기 <input checked="" type="checkbox"/> 기타                                                                                                                                                                                                                                                                                                                                                                                                                                                                         |            |                                                                                      |  |  |
| 연구예정기간                | IRB승인일 ~ 2024년 12월 31일                                                                                                                                                                                                                                                                                                                                                                                                                                                                                                                                                    |            |                                                                                      |  |  |
| 심의일자                  | 2024년 05월 29일                                                                                                                                                                                                                                                                                                                                                                                                                                                                                                                                                             | 승인일자       | 2024년 05월 30일                                                                        |  |  |
| 심의내용<br>(심의자료)        | <div><div><input checked="" type="checkbox"/> 제출서류: ① 심의면제 신청서<br/>② 연구계획서 요약<br/>③ 연구대상자 동의 면제 사유서<br/>④ 연구 책임자의 최근 이력서<br/>⑤ 연구자 GCP 교육 이수증<br/>⑥ 연구자 준수 서약서<br/>⑦ 이해상충 서약서</div><div><input checked="" type="checkbox"/> 면제사유: 후향적 연구로 5례 이하의 임상사례에 대한 증례보고 연구</div><div><input checked="" type="checkbox"/> 심의제출내용: ① 학습용, 연구대상에 포함되는 환자 1명을 대상으로 한 증례보고<br/>② 2형 당뇨병으로 진단받은 후 2개월 전부터 서서히 커지기 시작한<br/>오른쪽 두 번째 발가락 끝의 약 1*1cm 가량의 궤양을 lower<br/>extremity angio contrast enhanced CT 및 MRI 상에서<br/>wound evaluation과 절제 및 생검을 통한 병리학적 소견의<br/>비교를 하고자 함.</div></div> |            |                                                                                      |  |  |
| 심의결과                  | <input checked="" type="checkbox"/> 승인 <input type="checkbox"/> 시정승인 <input type="checkbox"/> 보완 <input type="checkbox"/> 반려 <input type="checkbox"/> 중지 또는 보류                                                                                                                                                                                                                                                                                                                                                                                                            |            |                                                                                      |  |  |
| 심의결과<br>의 사유<br>또는 의견 | 특이사항 없으므로 승인                                                                                                                                                                                                                                                                                                                                                                                                                                                                                                                                                              |            |                                                                                      |  |  |
| 승인유효기간                | 승인일로부터 ~ 2024년 12월 31일                                                                                                                                                                                                                                                                                                                                                                                                                                                                                                                                                    |            |                                                                                      |  |  |
| 지속심의<br>여부            | <input type="checkbox"/> 예(보고시기:        )<br><input checked="" type="checkbox"/> 아니오                                                                                                                                                                                                                                                                                                                                                                                                                                                                                      | 중간보고<br>여부 | <input type="checkbox"/> 예(보고시기:        )<br><input checked="" type="checkbox"/> 아니오 |  |  |

귀하(귀사)가 신청한 위 연구과제에 대해 임상시험심사위원회(2024년도 5월 제 2차 신속심의)에서 심의.  
검토하여 위와 같이 결정하였음을 통지하오니, 업무에 참고하시기 바랍니다.

2024년 05월 30일

임상연구심의위원장 안 병 준 

안병준  
(서명)

- \* 본 위원회는 ICH-GCP 및 KGCP를 준수하며, 생명윤리 및 안전에 관한 법률 등 관련 법규를 준수합니다.
- \* 임상시험심사위원회에서 재평가하여 변경이나 보완을 요청할 수 있습니다.
- \* 만약 본 위원회의 심의결과에 불복할 경우, 심의결과 통보 후 그 사유를 기록하여 이의를 신청할 수 있습니다.
- \* 본 위원회에서 통지한 대로 연구기간 1년마다 지속심의 신청서를 연구 종료 시에는 종료 및 결과보고서를 작성하여 제출해 주시기 바랍니다.
- \* 연구 중에 중대한 이상반응(Adverse Event) 발생 시 책임연구자는 본 위원회에 즉시 보고해야 합니다.
- \* 본 임상연구 결과는 임상시험실시기관의 사전 서면동의 없이는 어떤 경우라도 학술목적 이외에 실시 기관명을 사용할 수 없습니다.

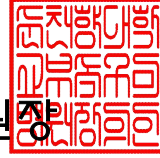

## 순천향대학교 부속 구미병원

(문의) 임상연구심의위원회 - 경북 구미시 1공단로 179 순천향대학교구미병원 / Tel 468-9648
